# Supplementary material
Source: PubMed Central journal article supplement (PMC2881809)

## SUPPLEMENTAL DATA

### SUPPLEMENTAL FIGURE LEGENDS

**Figure S1.** Secondary structure predictions for human NMNAT2. The annotated secondary structures of NMNAT1 (PDB:1kku\_A) and NMNAT3 (PDB:1nur\_A) are collectively represented in line 9 (1kku/1nur). Common elements are written in upper case. X designates non-resolved regions. Porter, Sable, Jpred3, PROFking, SSpro, and PSIPRED are secondary structure prediction tools based on comparative prediction algorithms. The corresponding predictions for NMNAT2 are displayed. The amino acid stretch Lys107 to Thr148 of ISTID2 seems to be rather unstructured, while the second part, Ala149 to Leu192, might harbor several structural elements. Fold recognition was performed using mGenTHREADER, which detected NADPH dependent prostaglandin E(2) 9 reductase (rabbit; PDB:1q5m) as a structural template for prediction of the ISTID fold (line 8). ISTID2 of NMNAT2 is highlighted in red. Structural elements are designated as follows: C, coiled (unstructured); H,  $\alpha$ -helical; E,  $\beta$ -strand.

**Figure S2.** Schematic representation of the NMNAT constructs generated and used in this study. Human NMNAT cDNA sequences were introduced into eukaryotic expression vectors. The various constructs were generated as described in Experimental Procedures. The specification of tags, mutations and other alterations is indicated in the box. The designation of the constructs has been used throughout this study.

**Figure S3.** Fine localization of NMNAT2. NMNAT2 does not co-localize with TGN and other post-Golgi compartments. N-terminally Flag-tagged NMNAT2 wild-type was over-expressed in HeLa S3 cells and subjected to immunofluorescence analyses using mouse anti-Flag antibody as well as IgGs specific for endogenous markers of different Golgi compartments: *cis*-Golgi (GM130), ER-Golgi intermediate compartment (ERGIC-53), and trans-Golgi network/late endosomes (CI-MPR).

**Figure S4.** Multiple sequence alignment of vertebrate NMNAT orthologs. From the ENSEMBL database (release 53) (45), 15 sequences for NMNAT1s (length of the gap free alignment is 275 codons), 13 sequences for NMNAT2 (300 codons), and 10 sequences for NMNAT3 (232 codons) from various vertebrate species, including humans, were extracted. For NMNAT2 an additional sequence was obtained from the lamprey (*Petromyzon marinus*) genome assembly ([http://genome.wustl.edu/pub/organism/Other\\_Vertebrates/Petromyzon\\_marinus/assembly/Petromyzon\\_marinus-3.0/output/](http://genome.wustl.edu/pub/organism/Other_Vertebrates/Petromyzon_marinus/assembly/Petromyzon_marinus-3.0/output/)) using GeneWise gene prediction (46). Corresponding protein sequences were aligned using MUSCLE (67) and prepared with PAL2NAL (68). Manual inspection revealed a low alignment quality for the C-terminus of NMNAT3, thus the alignment was trimmed in order to reduce the probability of overaligning. Residues belonging to the ISTIDs of vertebrate NMNATs are collectively surrounded by the red box.

(A) The multiple sequence alignment of vertebrate NMNAT1 orthologs is shown.

(B) The multiple sequence alignment of vertebrate NMNAT2 orthologs is shown.

(C) The multiple sequence alignment of vertebrate NMNAT3 orthologs is shown.

### SUPPLEMENTAL REFERENCES

67. Edgar, R. C. (2004) *Nucleic Acids Res.* **32**, 1792-1797
68. Suyama, M., Torrents, D., and Bork, P. (2006) *Nucleic Acids Res.* **34**, W609-W612

# Figure S1

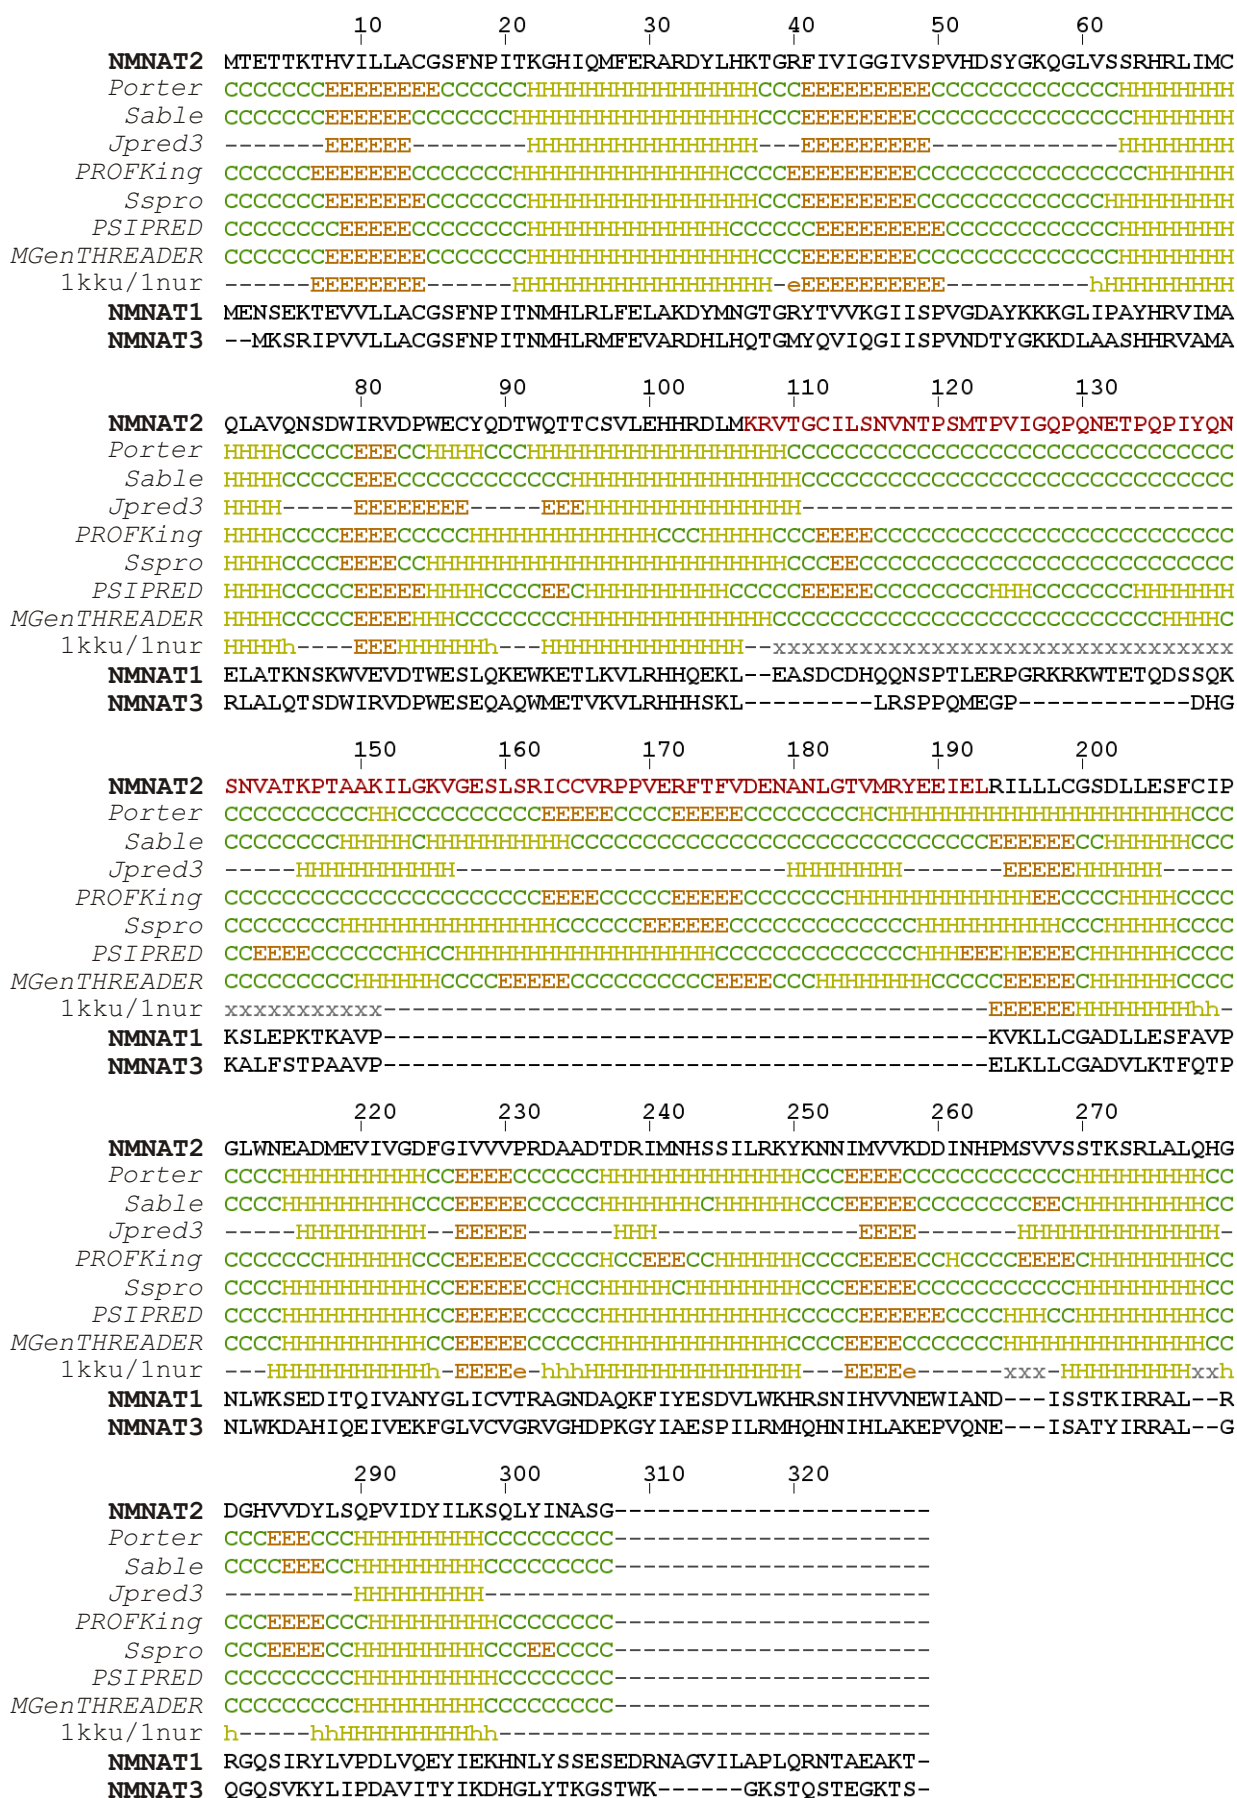

# Figure S2

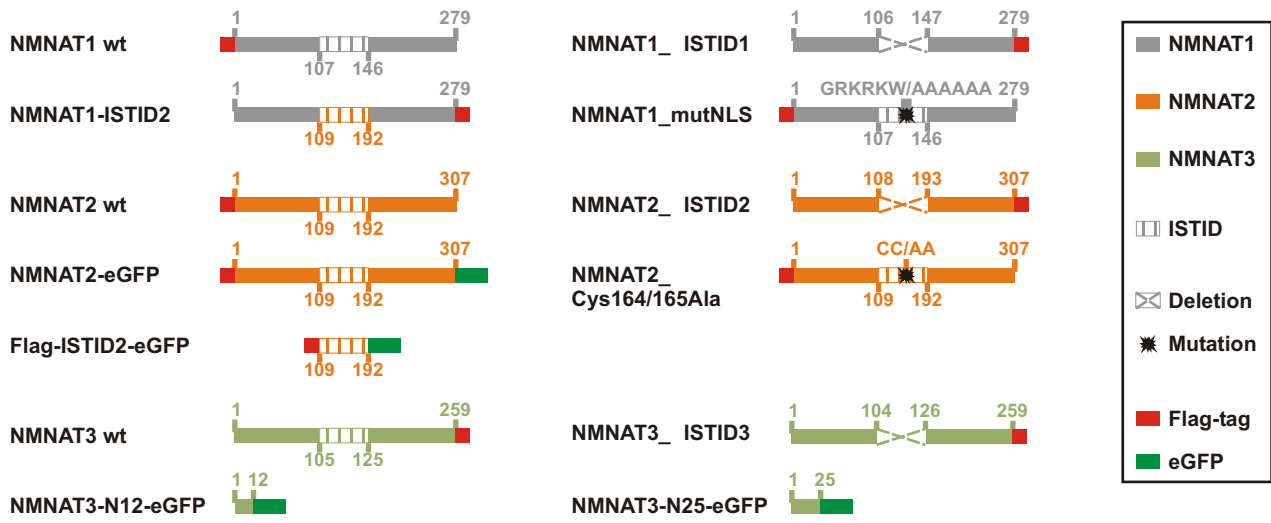

Figure S3

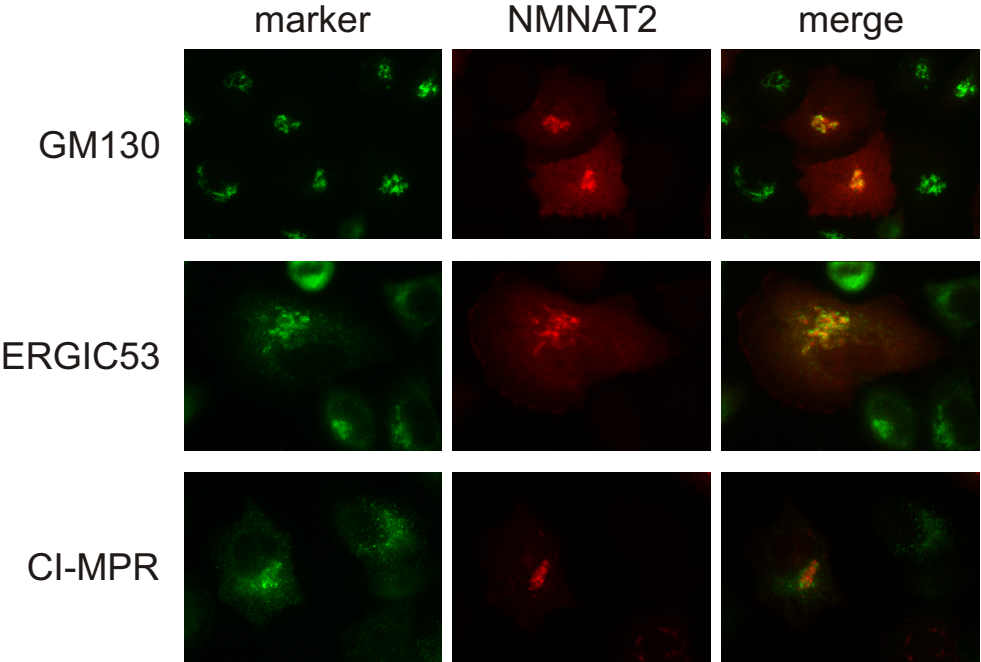

# Figure S4

## A

|                            | 10    | 20                      | 30            | 40                   | 50         | 60              | 70            | 80          | 90          |
|----------------------------|-------|-------------------------|---------------|----------------------|------------|-----------------|---------------|-------------|-------------|
| <i>H. sapiens</i>          | MENSE | KTEVLLACGSFNPITNMHLRFL  | FELAKDYMNGTGR | YTVKGIISPVGDAYK      | KKGLIPAYH  | RVIMAELATKNS    | KWVEVDTWESLQ  | KEW         | KETLKV      |
| <i>R. norvegicus</i>       | MDSSE | KTEVLLACGSFNPITNMHLRFL  | FELAKDYLN     | ATGEYKVIKGIISPVGDAY  | YKKGLIPAH  | HRVIMAELATKNS   | HWVEVDTWESLQ  | KEW         | VELTIV      |
| <i>S. tridecemlineatus</i> | MDKSE | KTEVLLACGSFNPITNMHLRFL  | FELAKDYLN     | GTGKYRVIKGIISPVGDAY  | YKKGLIPAH  | HRVIMAELATKNS   | SNWVEVDTWESLQ | KEW         | TETVKV      |
| <i>P. vampyrus</i>         | MESSE | KTDVLLACGSFNPITNMHLRFL  | FELAKDYMNGTGR | YRVIKGIISPVGDAY      | YKKGLISA   | HHRVIMAELATKNS  | EWVEVDTWESLQ  | KD          | VETAKV      |
| <i>O. princeps</i>         | MANSE | KTEVLLACGSFNPITNMHLRFL  | FELAKDYMS     | TGKYKVIKGIISPVGDAY   | RKKGLIP    | AHHRVIMAELATK   | HLD           | WVEVDTWESLQ | KD          |
| <i>H. lucifugus</i>        | MENPQ | KTEVLLACGSFNPITNMHLRFL  | FELAKDY       | MATGKYRVIKGIISPVGDAY | YKKGLISA   | HHRVIMAELAT     | QLATQT        | SS          | WVEVDTWESLQ |
| <i>M. musculus</i>         | MDSSE | KTEVLLACGSFNPITNMHLRFL  | FELAKDY       | MATGKYRVIKGIISPVGDAY | YKKGLIP    | AHHRVIMAELATKNS | HWVEVDTWESLQ  | KEW         | VETVKV      |
| <i>M. mulatta</i>          | MENSE | KTEVLLACGSFNPITNMHLRFL  | FELAKDYMNGTGR | YTVKGIISPVGDAY       | YKKGLIPAYH | RVIMAELATKNS    | KWVEVDTWESLQ  | KEW         | KETLKV      |
| <i>L. africana</i>         | MENSE | KTEVLLACGSFNPITNMHLRFL  | FELAKDYMNGTGR | YTVKGIISPVGDAY       | YKKGLIPAH  | HRVIMAELATKNS   | KWVEVDTWESLQ  | KEW         | VETAKV      |
| <i>E. caballus</i>         | MENSE | KTEVLLACGSFNPITNMHLRFL  | FELAKDYMNGTGR | YTVKGIISPVGDAY       | YKKGLISA   | HHRVIMAELATKNS  | EWVEVDTWESLQ  | KEW         | VETAKV      |
| <i>E. telfairi</i>         | MENSE | KTEVLLACGSFNPITNMHLRFL  | FELAKDYMNGTGR | YTVKGIISPVGDAY       | YKKGLIPAH  | HRVIMAELATKNS   | KWVEVDTWESLQ  | KEW         | VETAKV      |
| <i>D. novemcinctus</i>     | METSE | KTEVLLACGSFNPITNMHLRFL  | FELAKDYMNGTGR | YTVKGIISPVGDAY       | YKKGLIPAH  | HRVIMAELATKNS   | KWVEVDTWESLQ  | KEW         | VETAKV      |
| <i>C. hoffmanni</i>        | METSE | KTEVLLACGSFNPITNMHLRFL  | FELAKDYMNGTGR | YTVKGIISPVGDAY       | YKKGLIPAH  | HRVIMAELATKNS   | KWVEVDTWESLQ  | KEW         | VETAKV      |
| <i>C. porcellus</i>        | MELSE | RTEVLLACGSFNPITNMHLRFL  | FELAKDYMNGTGR | YTVKGIISPVGDAY       | YKKGLIPAH  | HRVIMAELATKNS   | GWVEVDTWESLQ  | KEW         | VETAKV      |
| <i>A. carolinensis</i>     | MEDSE | DTTEVLLACGSFNPITNMHLRFL | FELAKDYMNGTGR | YTVKGIISPVGDAY       | YKKGLIPAH  | HRVIMAELATKNS   | DWVEVDTWESLQ  | KEW         | QETVKV      |

### ISTID1

|                            | 100           | 110  | 120        | 130      | 140   | 150             | 160         | 170           | 180           | 190           |           |          |          |    |     |           |          |       |    |       |     |    |     |      |
|----------------------------|---------------|------|------------|----------|-------|-----------------|-------------|---------------|---------------|---------------|-----------|----------|----------|----|-----|-----------|----------|-------|----|-------|-----|----|-----|------|
| <i>H. sapiens</i>          | RHHQEKLEASD   | CDHQ | NSFTLERP   | GRKKR    | TE    | TQDSSQKKSLEPKT  | AVPKV       | KLLCGADLLESF  | AVPNLWKS      | EDITQIV       | ANVGLICV  | TRAGNDAQ | KFIY     |    |     |           |          |       |    |       |     |    |     |      |
| <i>R. norvegicus</i>       | IHHQEKLEATGSR | SHP  | SSPVLERP   | GRKKR    | ADQ   | KDSSPQKPEKPT    | GVPR        | VKLLCGADLLESF | SVPNLWK       | MEDITQIV      | ANFGLICV  | TRAGNDAQ | KFIY     |    |     |           |          |       |    |       |     |    |     |      |
| <i>S. tridecemlineatus</i> | RHHQEKLEAGN   | CDQR | NSPVVERS   | GRKKR    | LE    | ERQDSSQKKSLEPKT | GVPE        | VKLLCGADLLESF | GVPNLWKS      | EDITRI        | VADVGLICV | TRAGNDAQ | KFIY     |    |     |           |          |       |    |       |     |    |     |      |
| <i>P. vampyrus</i>         | RHHQEKLEAHI   | CDHQ | QDSSPGLERP | GRKKR    | AE    | QSEEFNQKKSLEPKT | DGPKI       | KLLCGADLLESF  | GVPNLWKS      | EDITKI        | VGDVGLICV | TRAGNDAQ | KFIY     |    |     |           |          |       |    |       |     |    |     |      |
| <i>O. princeps</i>         | RHHQEKLEAS    | WQQ  | QSSLGLERP  | GRKKR    | AE    | PPDPQKKSLEPKT   | GVPR        | VKLLCGADLLESF | SVPNLWKS      | EDITRI        | VADVGLICV | TRAGNDAQ | KFIY     |    |     |           |          |       |    |       |     |    |     |      |
| <i>H. lucifugus</i>        | RHHQEKLEARG   | CE   | QDSSPVLERP | GRKKR    | AE    | QSELQKKTPEPQR   | KDVPK       | VKLLCGADLLESF | GVPNLWKS      | EDITRI        | VADVGLICV | TRAGNDAQ | KFIY     |    |     |           |          |       |    |       |     |    |     |      |
| <i>M. musculus</i>         | RHHQEKLEATGS  | CYP  | SSPALERP   | GRKKR    | AD    | QDSSPQKPEKPT    | GVPR        | VKLLCGADLLESF | SVPNLWKS      | EDITQIV       | ANFGLICV  | TRAGNDAQ | KFIY     |    |     |           |          |       |    |       |     |    |     |      |
| <i>M. mulatta</i>          | RHHQEKLEAS    | CGHP | NSFTLERL   | GRKKR    | TE    | KDSSQKKSLEPKT   | AVPKV       | KLLCGADLLESF  | AVPNLWKS      | EDITQIV       | ANVGLICV  | TRAGNDAQ | KFIY     |    |     |           |          |       |    |       |     |    |     |      |
| <i>L. africana</i>         | RHHQEKLEAS    | NSDN | QDSSP      | SLERS    | GRKKR | TE              | QREDF       | SQKKSLEPKT    | AVPKV         | KLLCGADLLESF  | GVPNLWKS  | EDITQIV  | ANVGLICV |    |     |           |          |       |    |       |     |    |     |      |
| <i>E. caballus</i>         | RHHQEKLEASS   | CNE  | QDSSPVLERP | GRKKR    | AE    | QRQD            | FSQKKSLEPKT | GVPE          | VKLLCGADLLESF | GVPNLWKS      | EDITQIV   | ANVGLICV | TRAGNDAQ |    |     |           |          |       |    |       |     |    |     |      |
| <i>E. telfairi</i>         | RHHQEKLEARN   | WDNK | QDSSP      | ILERP    | GRKKR | TE              | QRQD        | FSQKKSLEPKT   | GVPE          | VKLLCGADLLESF | GVPNLWKS  | EDITQIV  | ANVGLICV |    |     |           |          |       |    |       |     |    |     |      |
| <i>D. novemcinctus</i>     | RHHREKLE      | DRN  | QD         | NSFTLERP | GRKKR | TE              | QRQD        | FSQKKSLEPKT   | GVPE          | VKLLCGADLLESF | GVPNLWKS  | EDITQIV  | ANVGLICV |    |     |           |          |       |    |       |     |    |     |      |
| <i>C. hoffmanni</i>        | RHHQEKLEAS    | N    | QD         | NSFTLERP | GRKKR | TE              | QRQD        | FSQKKSLEPKT   | GVPE          | VKLLCGADLLESF | GVPNLWKS  | EDITQIV  | ANVGLICV |    |     |           |          |       |    |       |     |    |     |      |
| <i>C. porcellus</i>        | SVHQEKLEAGS   | CHQ  | NSFTLERP   | GRKKR    | AE    | PRQ             | NSQKKSLEPKT | GVPE          | VKLLCGADLLESF | GVPNLWKS      | EDITQIV   | ANVGLICV |          |    |     |           |          |       |    |       |     |    |     |      |
| <i>A. carolinensis</i>     | RLTTGGAV      | ASL  | NCQ        | QAGLFNGR | LT    | PL              | LQ          | THDLS         | VSSD          | L             | LQ        | LH       | CP       | QL | KML | CGADLLESF | RVPNLWKS | EDMAE | IV | AYGMV | CIS | RV | SSA | KFIY |

### NLS

|                            | 200    | 210 | 220  | 230   | 240  | 250   | 260        | 270        |       |    |    |      |        |         |         |         |       |            |     |       |   |     |       |
|----------------------------|--------|-----|------|-------|------|-------|------------|------------|-------|----|----|------|--------|---------|---------|---------|-------|------------|-----|-------|---|-----|-------|
| <i>H. sapiens</i>          | ESDVLW | KHR | SNIH | VNEW  | ITND | ISSTK | IRRALRRGQS | IRYLV      | PD    | VQ | EY | IEKH | NLYSSE | EDRNAGV | ITLAP   | LQRNTAE | AKT   | .....      |     |       |   |     |       |
| <i>R. norvegicus</i>       | ESDVLW | RHQ | SNIH | LV    | TEW  | ITND  | ISSTK      | IRRALRRGQS | IRYLV | PD | VQ | EY   | IEKH   | NLYSSE  | EDRNAGV | ITLAP   | LQRNT | SEAKHNHSTR |     |       |   |     |       |
| <i>S. tridecemlineatus</i> | ESDVLW | KHR | SNIH | VNEW  | ITND | ISSTK | IRRALRRGQS | IRYLV      | PD    | VQ | EY | IEKH | NLYSSE | EDRNAGV | ITLAP   | LQRNTAE | AKS   | .....      |     |       |   |     |       |
| <i>P. vampyrus</i>         | ESDVLW | KHR | SNIH | VNEW  | ITND | ISSTK | IRRALRRGQS | IRYLV      | PD    | VQ | EY | IEKH | NLYSSE | EDRNAGV | ITLAP   | LQRNTAE | AKS   | .....      |     |       |   |     |       |
| <i>O. princeps</i>         | ESDVLW | RHR | SNIH | VNEW  | ITND | ISSTK | IRRALRRGQS | IRYLV      | PD    | VQ | EY | IEKH | NLYSSE | EDRNAGV | ITLAP   | LQRNTAE | AKS   | .....      |     |       |   |     |       |
| <i>H. lucifugus</i>        | ESDVLW | RHR | SNIH | VNEW  | ITND | ISSTK | IRRALRRGQS | IRYLV      | PD    | VQ | EY | IEKH | NLYSSE | EDRNAGV | ITLAP   | LQRNTAE | AKS   | .....      |     |       |   |     |       |
| <i>M. musculus</i>         | ESDVLW | RHR | SNIH | VNEW  | ITND | ISSTK | IRRALRRGQS | IRYLV      | PD    | VQ | EY | IEKH | NLYSSE | EDRNAGV | ITLAP   | LQRNTAE | AKS   | .....      |     |       |   |     |       |
| <i>M. mulatta</i>          | ESDVLW | KHR | SNIH | VNEW  | ITND | ISSTK | IRRALRRGQS | IRYLV      | PD    | VQ | EY | IEKH | NLYSSE | EDRNAGV | ITLAP   | LQRNTAE | AKS   | .....      |     |       |   |     |       |
| <i>L. africana</i>         | ESDVLW | KHR | SNIH | VNEW  | ITND | ISSTK | IRRALRRGQS | IRYLV      | PD    | VQ | EY | IEKH | NLYSSE | EDRNAGV | ITLAP   | LQRNTAE | AKS   | .....      |     |       |   |     |       |
| <i>E. caballus</i>         | ESDVLW | KHR | SNIH | VNEW  | ITND | ISSTK | IRRALRRGQS | IRYLV      | PD    | VQ | EY | IEKH | NLYSSE | EDRNAGV | ITLAP   | LQRNTAE | AKS   | .....      |     |       |   |     |       |
| <i>E. telfairi</i>         | ESDVLW | KHR | SNIH | VNEW  | ITND | ISSTK | IRRALRRGQS | IRYLV      | PD    | VQ | EY | IEKH | NLYSSE | EDRNAGV | ITLAP   | LQRNTAE | AKS   | .....      |     |       |   |     |       |
| <i>D. novemcinctus</i>     | ESDVLW | KHR | SNIH | VNEW  | ITND | ISSTK | IRRALRRGQS | IRYLV      | PD    | VQ | EY | IEKH | NLYSSE | EDRNAGV | ITLAP   | LQRNTAE | AKS   | .....      |     |       |   |     |       |
| <i>C. hoffmanni</i>        | ESDVLW | KHR | SNIH | VNEW  | ITND | ISSTK | IRRALRRGQS | IRYLV      | PD    | VQ | EY | IEKH | NLYSSE | EDRNAGV | ITLAP   | LQRNTAE | AKS   | .....      |     |       |   |     |       |
| <i>C. porcellus</i>        | ESDVLW | RHR | SNIH | VNEW  | ITND | ISSTK | IRRALRRGQS | IRYLV      | PD    | VQ | EY | IEKH | NLYSSE | EDRNAGV | ITLAP   | LQRNTAE | AKS   | .....      |     |       |   |     |       |
| <i>A. carolinensis</i>     | ESDVLW | KHK | KAN  | NIHLV | EW   | ITND  | ISASK      | IRRALRRGQS | RYLV  | PD | AV | LAY  | IEQ    | NLYTAE  | SE      | EQ      | N     | GVV        | LAP | LQYAK | E | ASK | ..... |

# Figure S4

## B

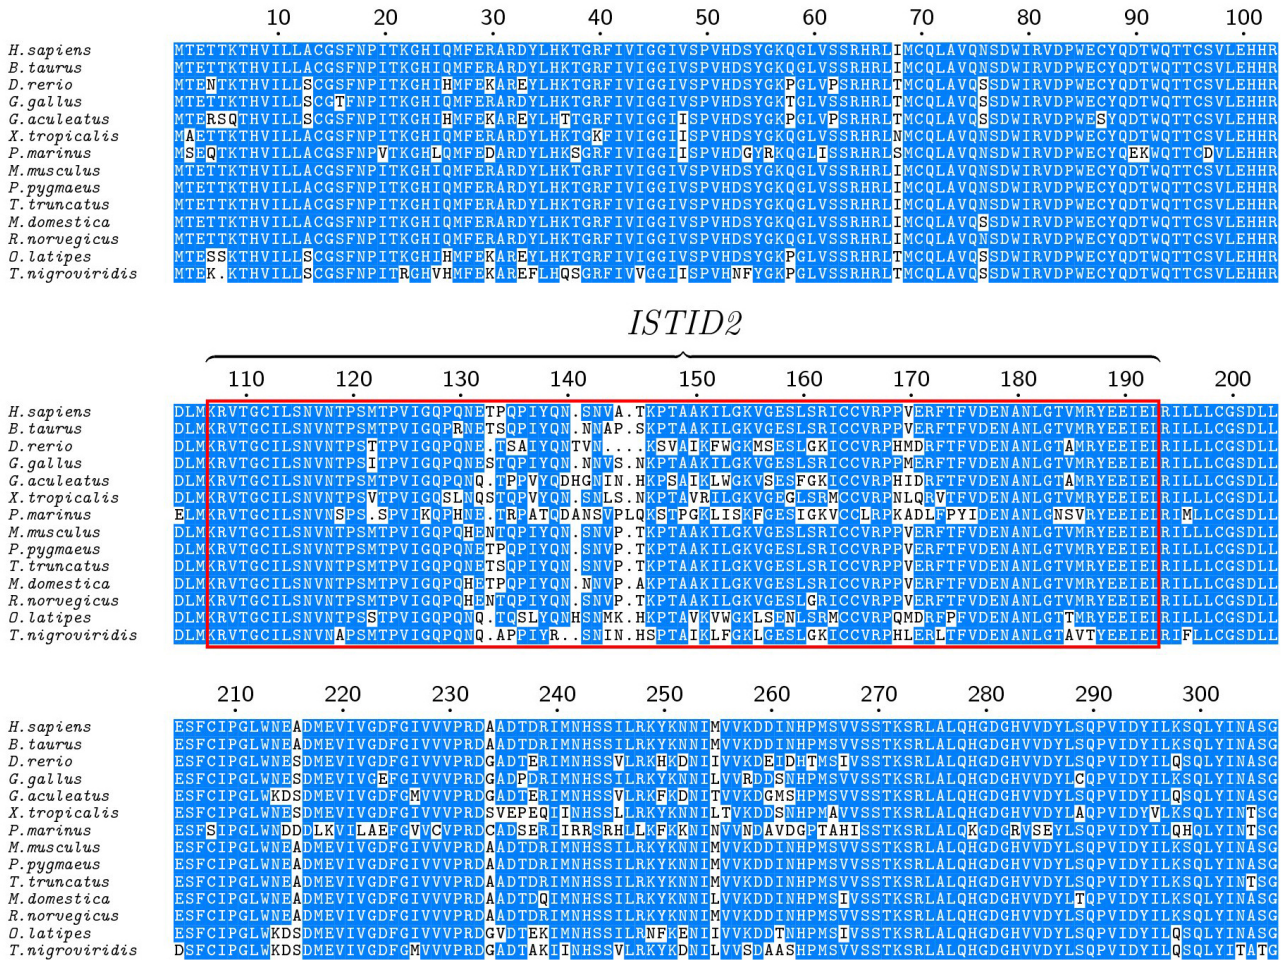

# Figure S4

C

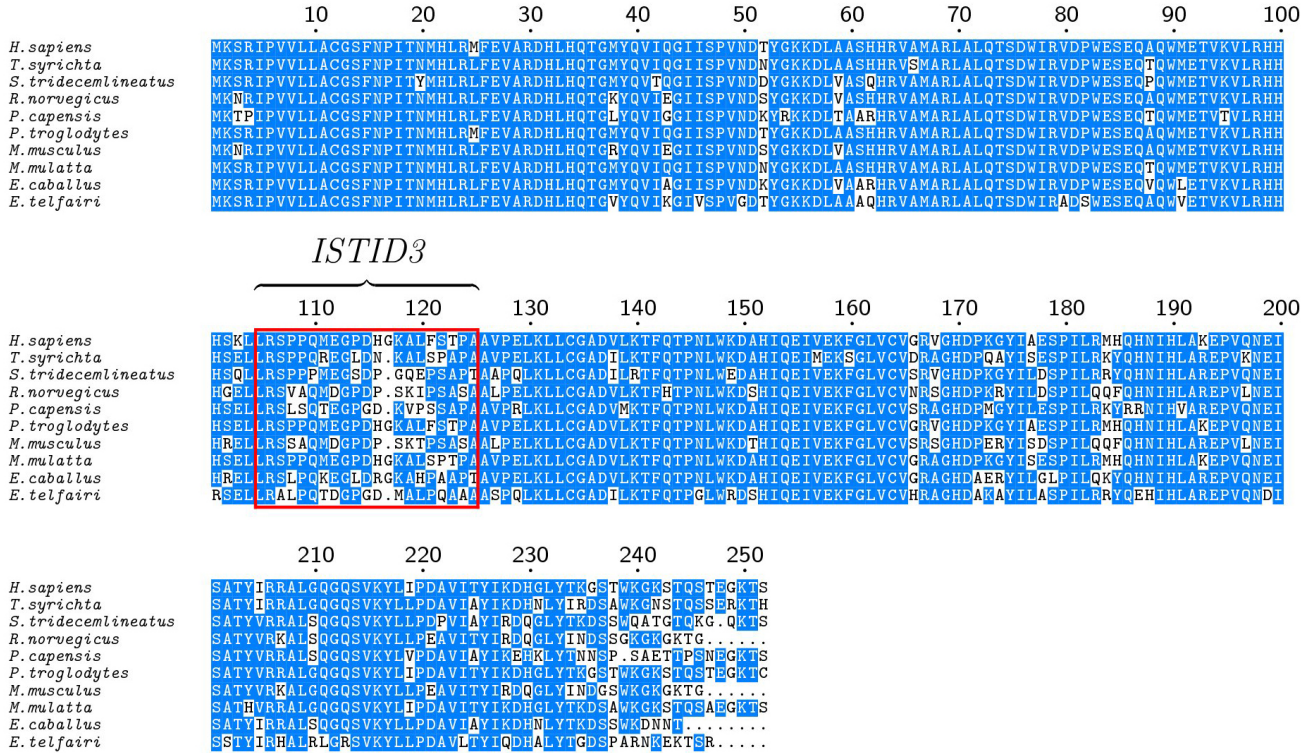

Supplement: supp_M110.107631_jbc.M110.107631-1.pdf [file supp_M110.107631_jbc.M110.107631-1.pdf]
